# Supplementary material for: Enhanced sulfide chemisorption using boron and oxygen dually doped multi-walled carbon nanotubes for advanced lithium–sulfur batteries
Source: Royal Society of Chemistry journal article supplement (doi:10.1039/c6ta07620c), 2016-11-07
Supplement: c6ta07620c1.pdf [file c6ta07620c1.pdf]

Electronic supplementary information

Enhanced sulfides chemisorption using boron and oxygen dually doped multi-walled carbon nanotubes for advanced lithium-sulfur batteries

Chengbin Jin,<sup>a,†</sup> Wenkui Zhang,<sup>a,†</sup> Zhenzhan Zhuang,<sup>b,†</sup> Jianguo Wang,<sup>b</sup> Hui Huang,<sup>a</sup> Yongping Gan,<sup>a</sup> Yang Xia,<sup>a</sup> Chu Liang,<sup>a</sup> Jun Zhang,<sup>a</sup> and Xinyong Tao<sup>a,\*</sup>

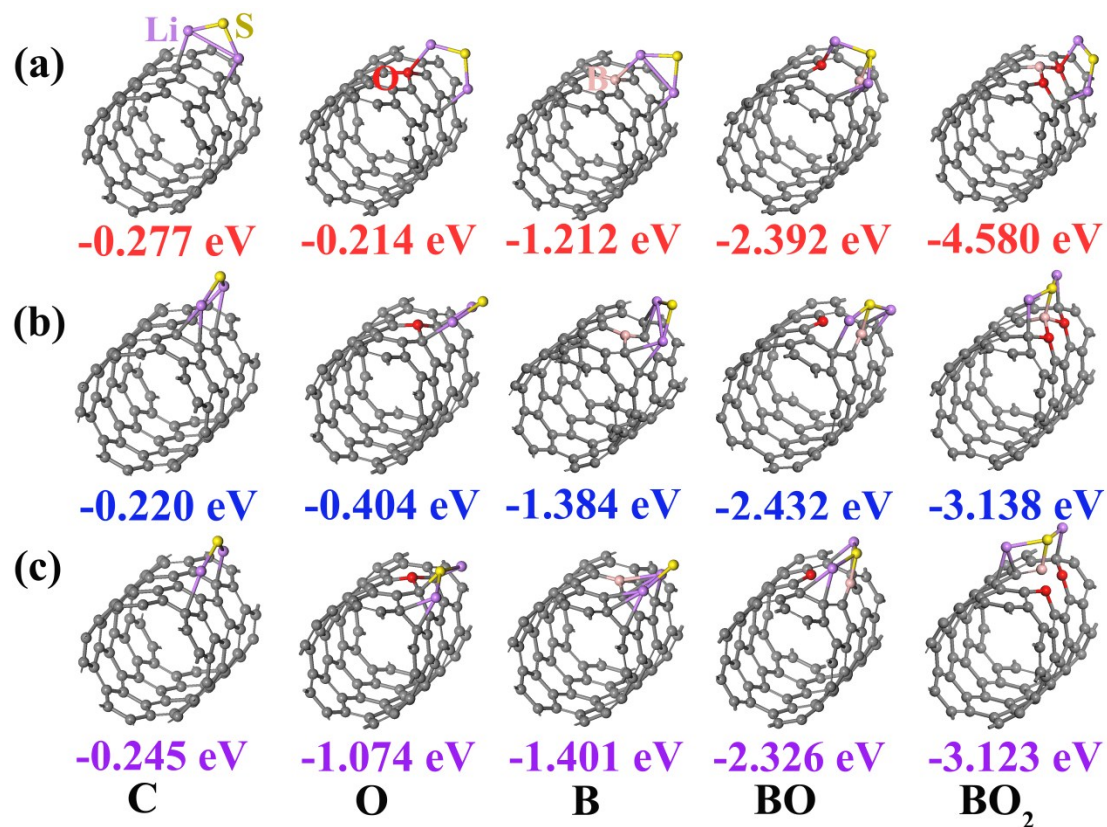

Fig. S1 Possible models of sulfide species on the surface of on pristine MWNTs with O, B, BO and BO<sub>2</sub> species.

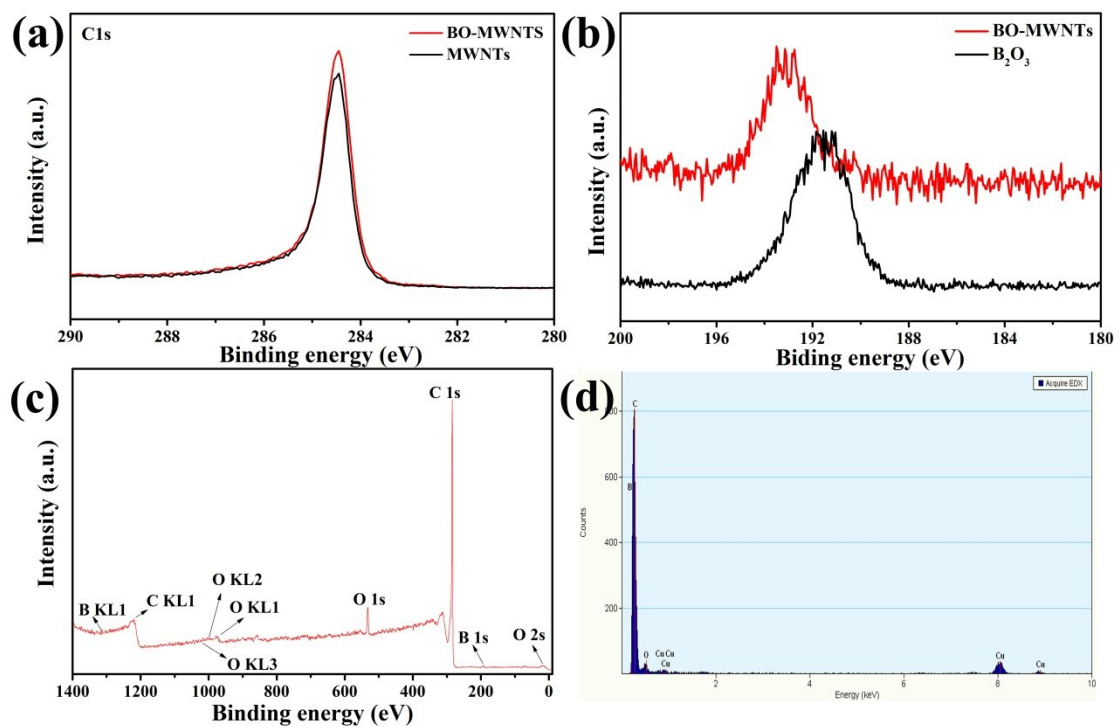

**Fig. S2** XPS results of (a) C 1s and (b) B 1s of BO-MWNTs and MWNTs, respectively. (c) XPS and (d) EDX full elements analysis of BO-MWNTs.

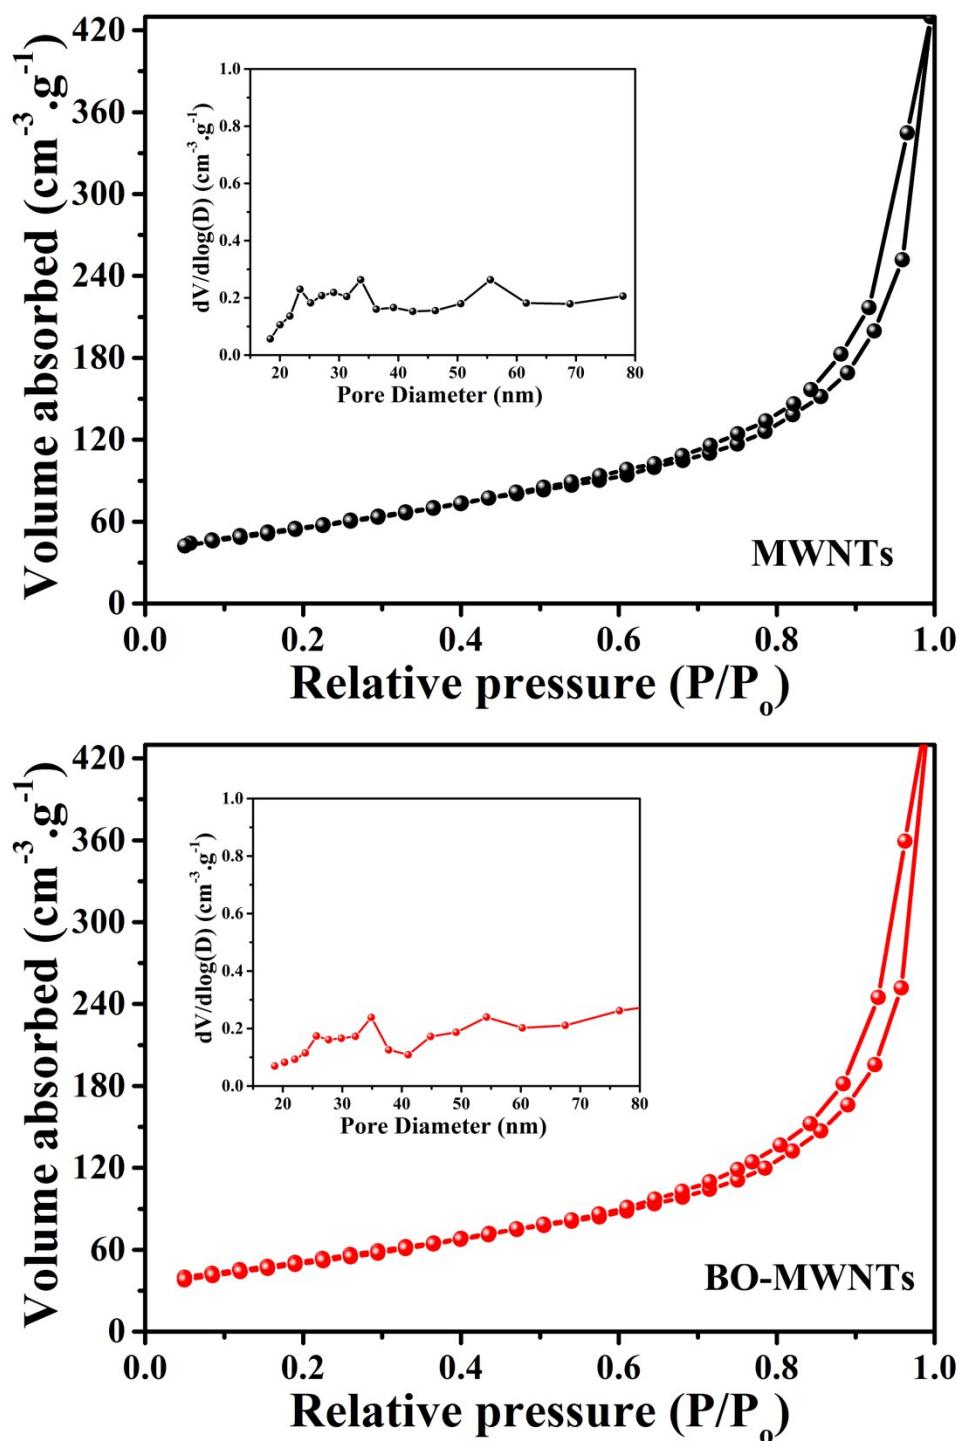

**Fig. S3** Pore size distribution curves and nitrogen adsorption–desorption isotherms of (a) MWNTs and (b) BO-MWNTs.

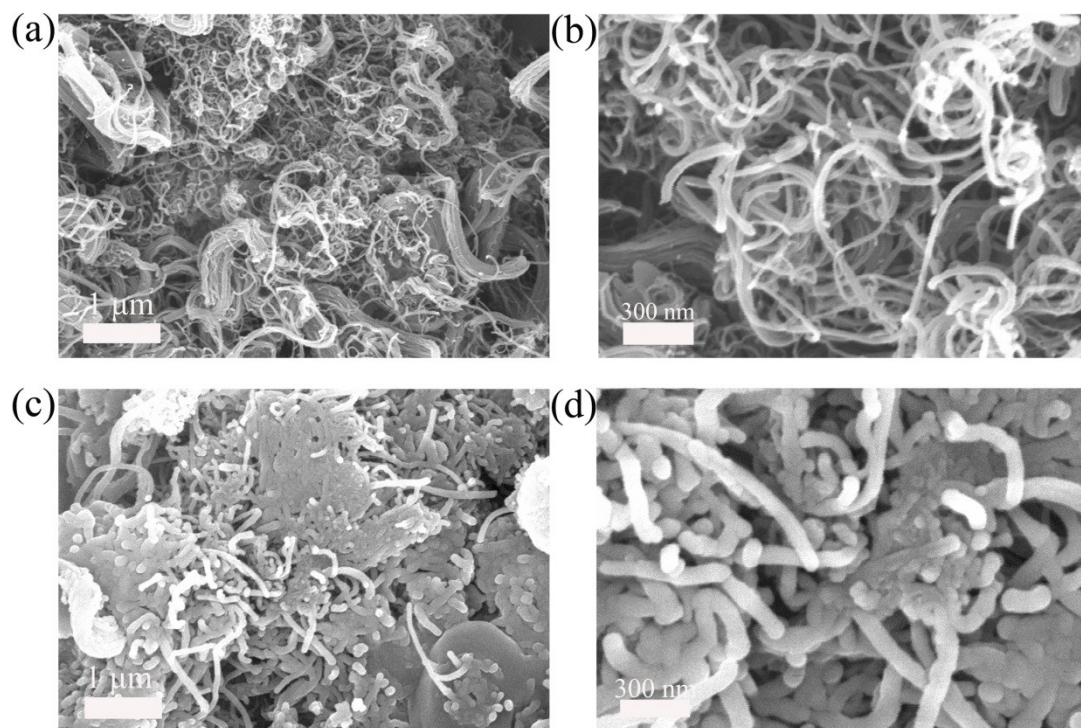

**Fig. S4** (a,b) SEM images of MWNTs; (c,d) SEM images of MWNTs/S composite with 69 wt % of sulfur.

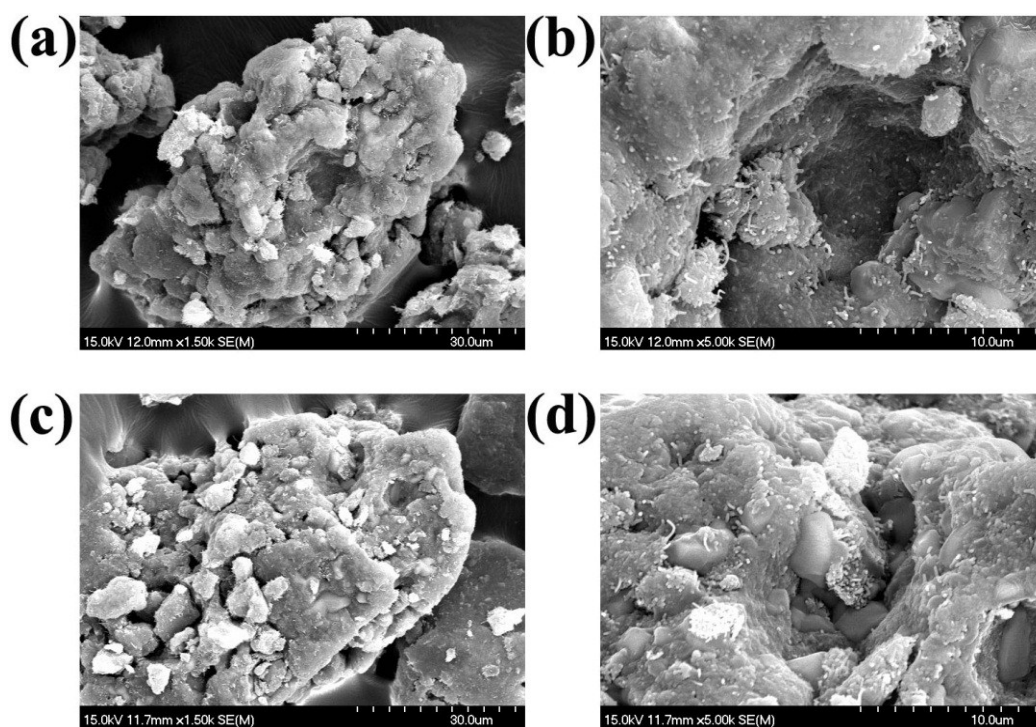

**Fig. S5** The low magnification SEM images of (a,b) BO-MWNTs/S and (c,d) MWNTs/S

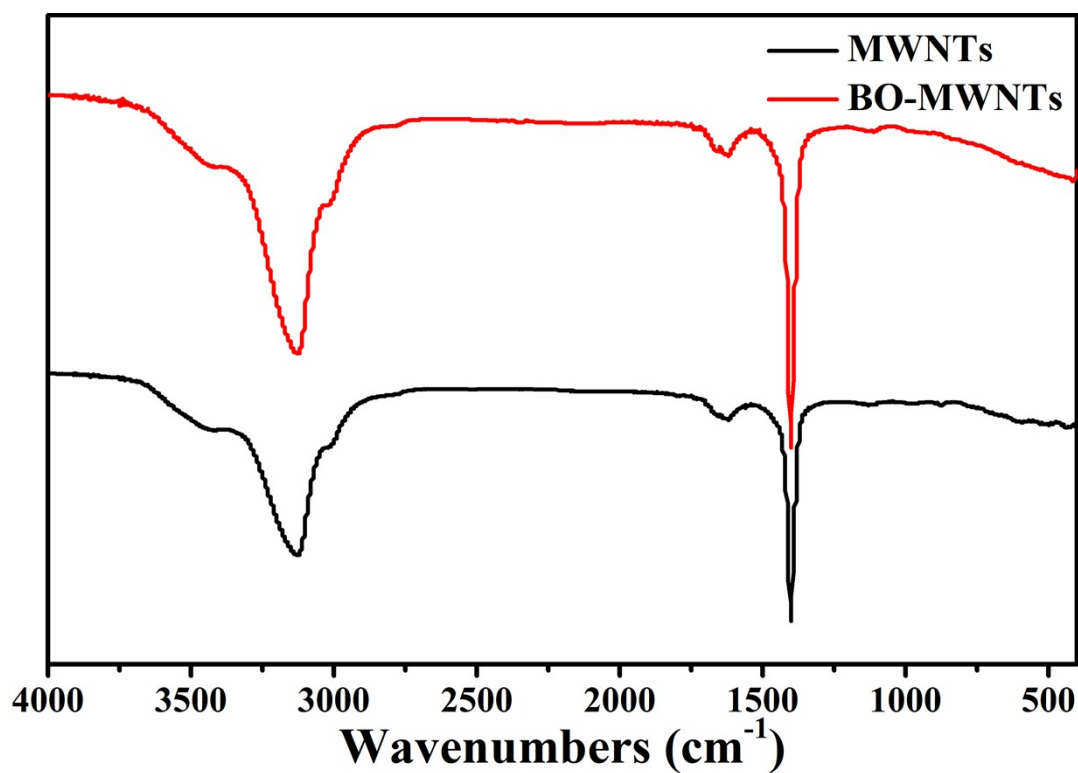

Fig. S6 FT-IR spectra of MWNTs and BO-MWNTs.

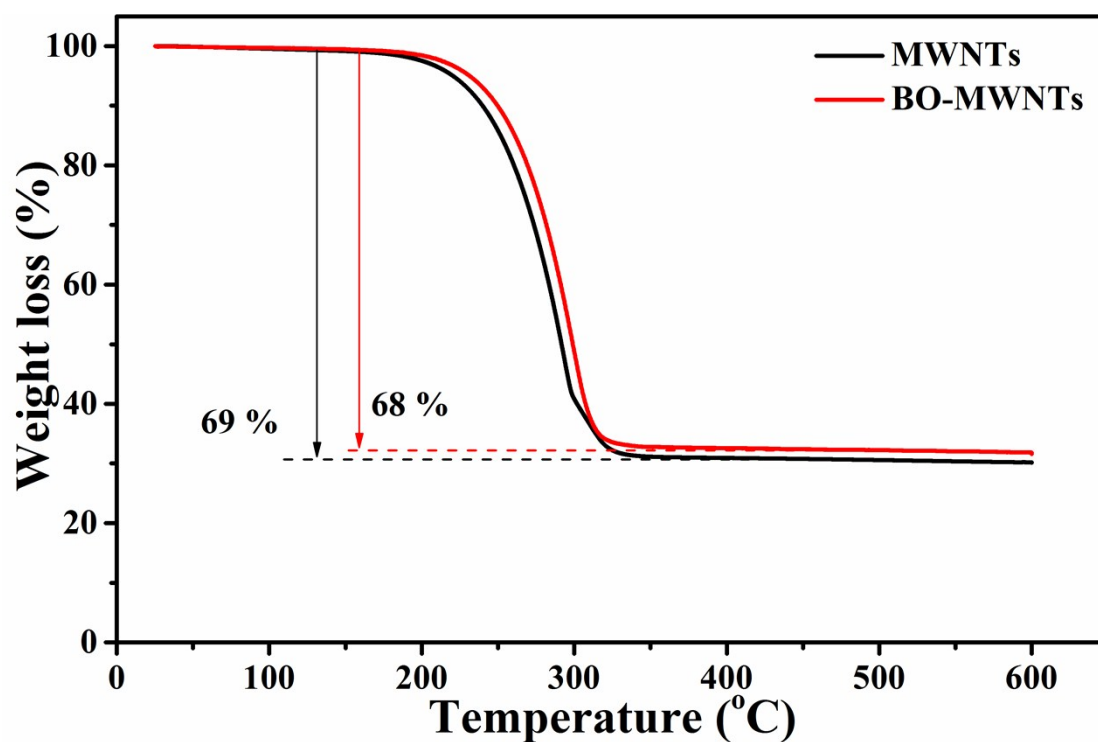

Fig. S7 TG curves of (a) MWNTs/S and (b) BO-MWNTs/S.

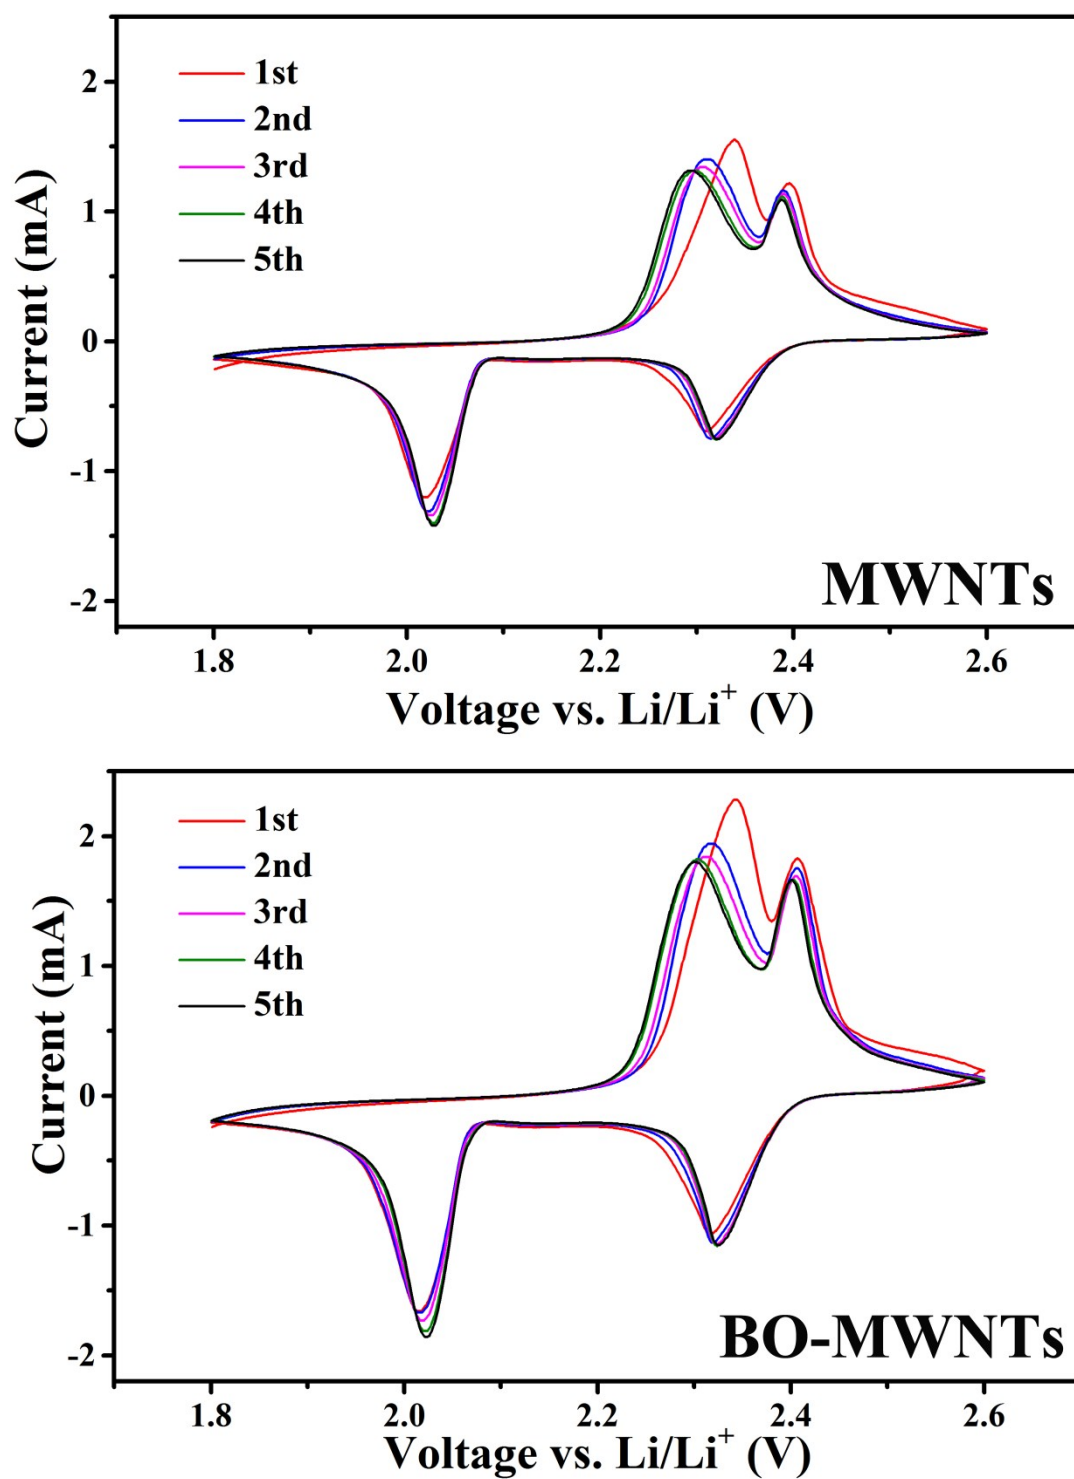

Fig. S8 CV curves of MWNTs/S and BO-MWNTs/S composites from 2.6 to 1.8 V.

**Table S1.** Electrical conductivity of MWNTs-S and BO-MWNT-S mixture

| Material                      | MWNTs-S | BO-MWNTs-S |
|-------------------------------|---------|------------|
| Conductivity ( $S\ cm^{-1}$ ) | 7.41    | 10.87      |

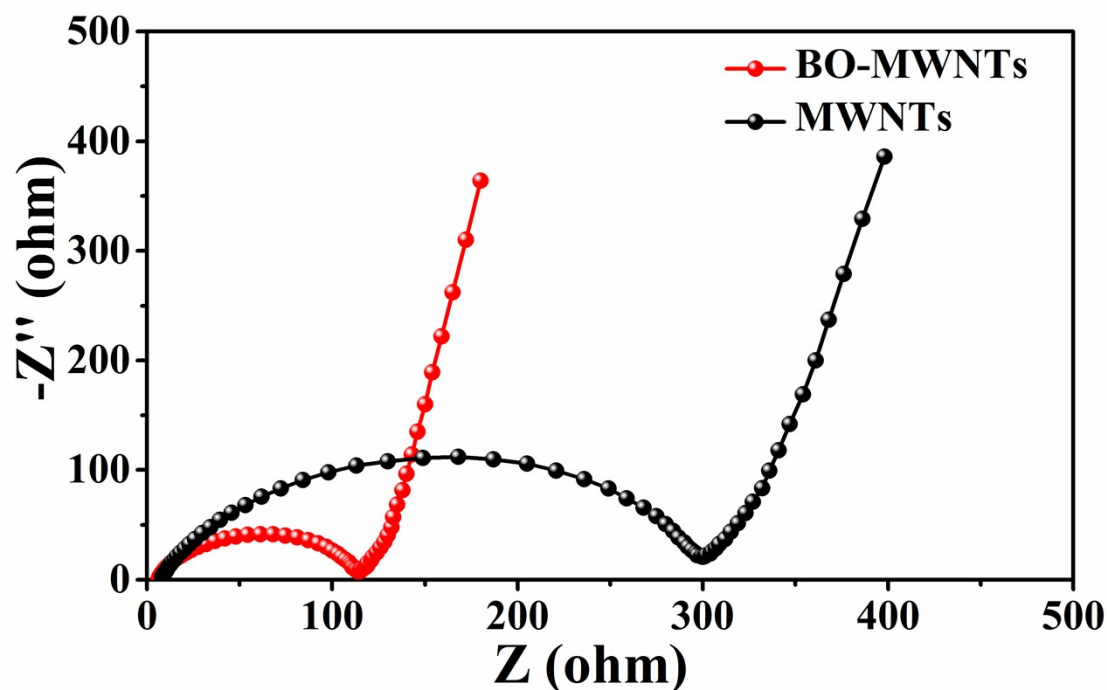**Fig. S9** EIS curves of MWNTs/S and BO-MWNTs/S composites.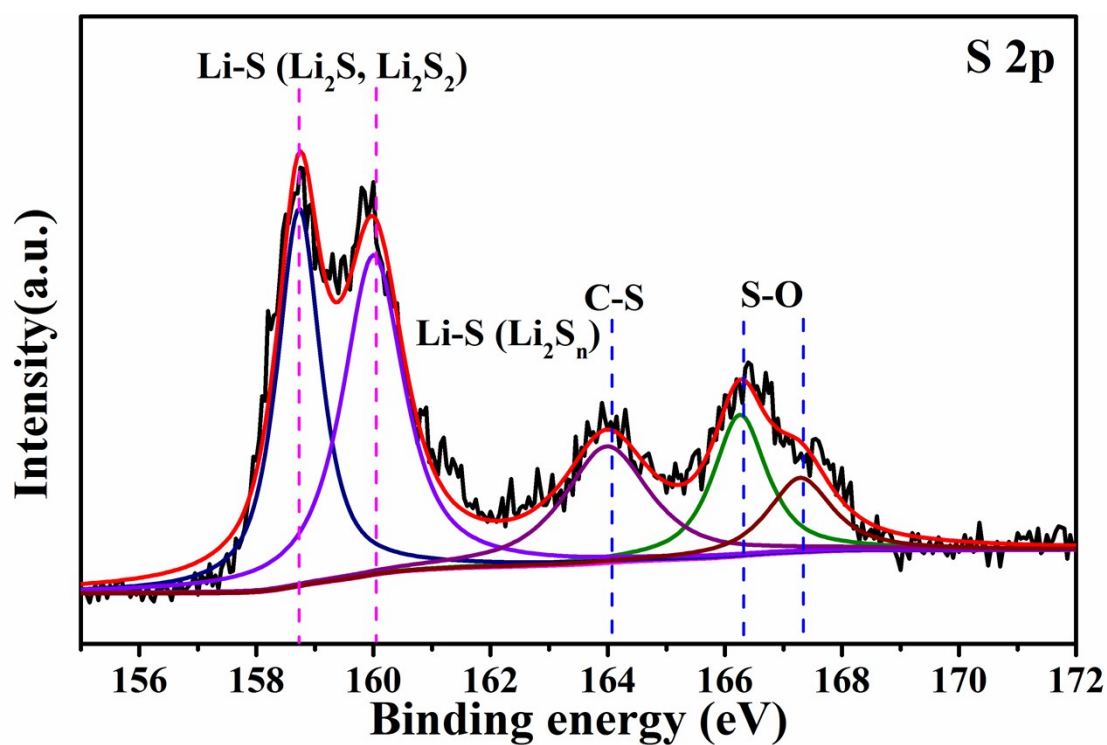**Fig. S10** XPS of S2p from electrode during discharging process.

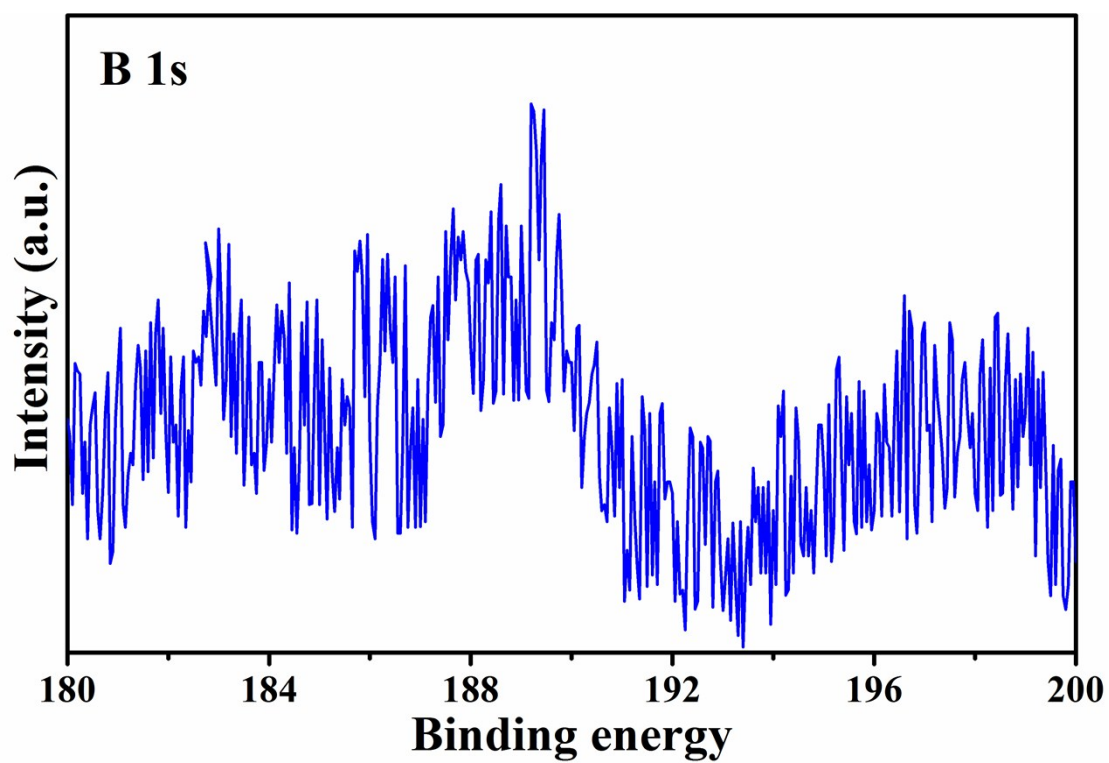

Fig. S11 XPS of B1s from electrode during discharging process.
